# Supplementary material
Source: PubMed Central journal article supplement (PMC5982812)
Supplement: kwy064sinhawebmaterialfinal.pdf [file kwy064sinhawebmaterialfinal.pdf]

## WEB APPENDIX

### Power of detecting associations with repeated microbiome measurements

For each subject, let  $X_i$  denote a metric for the “usual” microbiome at the specific body site and  $y_i = 0/1$  denote the binary outcome. Suppose that  $X_i \sim N(0,1)$  after normalization. We assume a logistic regression model to link the outcome with the usual microbiome:  $\log(y_i = 1|X_i) = \alpha + \beta X_i$ .

For each subject, we assume  $K$  repeated microbiome observations  $x_{ij} = X_i + \varepsilon_{ij}$  with  $\varepsilon_{ij} \sim N(0, \sigma^2)$ . By definition, the intraclass correlation coefficient (ICC) for the microbiome metric is given by

$$ICC = \frac{Var(X_i)}{Var(X_i) + Var(\varepsilon_{ij})} = \frac{1}{1 + \sigma^2}.$$

For each subject, we use  $\bar{X}_i = \frac{\sum_{j=1}^K x_{ij}}{K}$  as the estimate for the “usual” microbiome metric. Then,

$$Var(\bar{X}_i) = 1 + \frac{\sigma^2}{K} = 1 + \frac{1}{K} \frac{1}{ICC} - 1.$$

We assume  $N$  subjects in a case-control study with  $N\phi$  cases and  $N(1 - \phi)$  controls. We test the null hypothesis  $H_0: \beta = 0$  using the following score statistic based on  $\{\bar{X}_i, y_i\}$  pairs:

$$Z = \frac{\frac{\sum_{i: y_i=1} \bar{X}_i}{N\phi} - \frac{\sum_{i: y_i=0} \bar{X}_i}{N(1-\phi)}}{\sqrt{\left(\frac{1}{N\phi} + \frac{1}{N(1-\phi)}\right) Var(\bar{X}_i)}}.$$

Let  $\mu_+(\alpha, \beta) = E(X_i|y_i = 1)$  be expectation of microbiome metric in the case group and is a function of  $\beta$ . Similarly,  $\mu_-(\alpha, \beta) = E(X_i|y_i = 0)$  be the expectation of microbiome metric in the control group. Both  $\mu_+(\alpha, \beta)$  and  $\mu_-(\alpha, \beta)$  can be numerically derived by Monte Carlo methods. Then,  $E(\bar{X}_i|y_i = 1) = \mu_+(\alpha, \beta)$  and  $E(\bar{X}_i|y_i = 0) = \mu_-(\alpha, \beta)$ . The non-centrality parameter (NCP) of the score statistic is derived as

$$\xi = E_{\alpha, \beta}(Z) = \frac{\mu_+(\alpha, \beta) - \mu_-(\alpha, \beta)}{\sqrt{\frac{1}{N} \left( \frac{1}{\phi} + \frac{1}{1-\phi} \right) \left( 1 + \frac{1}{\text{ICC}} - 1 \right)}}$$

which leads to the formula for the required sample size:

$$N = \frac{\xi^2 \left( \frac{1}{\phi} + \frac{1}{1-\phi} \right) \left( 1 + \frac{1}{\text{ICC}} - 1 \right)}{[\mu_+(\alpha, \beta) - \mu_-(\alpha, \beta)]^2}.$$

### Derivation of the relationship between odds ratio and logistic regression coefficient $\beta$

Let  $d_0 = \Phi^{-1}(25\%) = -0.6745$  and  $d_1 = \Phi(75\%) = 0.6745$  be the 25% and 75% quantiles for the standard normal distribution. We derive the odds ratio (OR) comparing the risk between the top 25% quantile and the bottom 25% quantile:

$$OR = \frac{P(y_i = 1 | X_i > d_1) / P(y_i = 0 | X_i > d_1)}{P(y_i = 1 | X_i < d_0) / P(y_i = 0 | X_i < d_0)}$$

For rare diseases (e.g., colorectal cancer), OR is approximated by relative risk

$$RR = \frac{P(y_i = 1 | X_i > d_1)}{P(y_i = 1 | X_i < d_0)} = \frac{\int_{d_1}^{\infty} \frac{e^{\alpha + \beta x}}{1 + e^{\alpha + \beta x}} \phi(x) dx}{\int_{-\infty}^{d_0} \frac{e^{\alpha + \beta x}}{1 + e^{\alpha + \beta x}} \phi(x) dx}.$$

Note that for rare diseases,  $\alpha \ll 0$ , we have  $1 + e^{\alpha + \beta x} \approx 1$ . Thus,

$$OR \approx RR \approx \frac{\int_{d_1}^{\infty} e^{\beta x} \phi(x) dx}{\int_{-\infty}^{d_0} e^{\beta x} \phi(x) dx} = \frac{\Phi(\beta - d_1)}{\Phi(d_0 - \beta)}$$

## R-code for Power Calculations

```
# case.ratio: proportion of cases in all subjects, (0,1);
# alpha: critical value. You may choose 0.05, 0.001, ...
# n.repeats: 1,2,3 ...
# ICC: ICC values
# d0: bottom quantile
# d1: top quantile
# prevalence.code: prevalence in general population. 1--> 0.05, 2-->0.01, 3-->0.005 and 4--> 0.001
# OR is odds ratio. Can be a value or a vector
# Return number of cases to achieve 80% power.

Calculate.Sample.Size.Repeated.Samples <- function(case.ratio, alpha, ICC, d0, d1, prevalence.code, OR){

  # Please download a file "Beta.txt" from the link: https://www.dropbox.com/s/3og7p0yqjvwfzazn/Beta.txt
  beta = read.table("Beta.txt");
  delta = beta[,prevalence.code+1];
  beta = beta[,1];
  threshold = qnorm(0.8)+qnorm(1-alpha/2);
  n.OR = length(OR);

  N = matrix(0, 5, n.OR);

  for(k in 1:n.OR){
    index = order(abs(pnorm(beta-d1)/pnorm(d0-beta)-OR[k]))[1];
    for(i in 1:5)
      N[i,k]=floor(case.ratio*threshold^2/delta[index]^2*(1/case.ratio+1/(1-case.ratio))*((1/ICC-1)/i+1));
  }
  return(N);
}

# Example for the sample size table in manuscript
ICC = c(0.44,0.37,0.42,0.18,0.29,0.58,0.44,0.43,0.47,0.81,0.48);
OR = c(1.5,2,2.5,3,3.5);
result = matrix(0,0,5);
for(k in 1:11){
  temp = Calculate.Sample.Size.Repeated.Samples(0.25, 0.05, ICC[k], qnorm(0.25), qnorm(0.75), 2, OR);
  result = rbind(result, temp[1:3,]);
}
write.table(result,"number.cases.1vs3.p05.txt",row.names=F,col.names=F)
```

**Web Table 1.** Intraclass correlation coefficients for five common phyla

|            |            | <b>Body Site</b>            | <i>N</i> | <b>Actinobacteria</b> | <b>Bacteroidetes</b> | <b>Firmicutes</b> | <b>Fusobacteria</b> | <b>Proteobacteria</b> |
|------------|------------|-----------------------------|----------|-----------------------|----------------------|-------------------|---------------------|-----------------------|
| CRC study  | Gut        | Stool                       | 44       | 0.51                  | 0.29                 | 0.03              | 0.16                | 0.00                  |
| Costa Rica | Gut        | Stool                       | 121      | 0.44                  | 0.37                 | 0.42              | 0.33                | 0.61                  |
|            | Oral       | Saliva                      | 42       | 0.34                  | 0.48                 | 0.38              | 0.56                | 0.47                  |
| HMP        | Gut        | Stool                       | 107      | 0.00                  | 0.34                 | 0.39              | 0.19                | 0.21                  |
|            | Oral       | Saliva                      | 94       | 0.16                  | 0.41                 | 0.29              | 0.42                | 0.48                  |
|            | Oropharynx | Buccal mucosa               | 106      | 0.35                  | 0.31                 | 0.20              | 0.04                | 0.20                  |
|            |            | Hard palate                 | 101      | 0.00                  | 0.44                 | 0.47              | 0.48                | 0.24                  |
|            |            | Keratinized gingiva         | 104      | 0.00                  | 0.54                 | 0.38              | 0.35                | 0.33                  |
|            |            | Palatine tonsils            | 102      | 0.09                  | 0.31                 | 0.33              | 0.32                | 0.59                  |
|            |            | Subgingival plaque          | 102      | 0.19                  | 0.34                 | 0.29              | 0.18                | 0.35                  |
|            |            | Supragingival plaque        | 105      | 0.41                  | 0.41                 | 0.47              | 0.34                | 0.30                  |
|            |            | Throat                      | 103      | 0.07                  | 0.30                 | 0.22              | 0.14                | 0.50                  |
|            |            | Tongue dorsum               | 106      | 0.44                  | 0.39                 | 0.51              | 0.51                | 0.50                  |
|            |            | Oral average                | 103.6    | 0.19                  | 0.38                 | 0.36              | 0.29                | 0.38                  |
|            | Airway     | Anterior nares              | 78       | 0.24                  | 0.00                 | 0.10              | 0.02                | 0.07                  |
|            | Skin       | Left antecubital fossa      | 43       | 0.20                  | 0.08                 | 0.17              | 0.00                | 0.02                  |
|            |            | Right antecubital fossa     | 49       | 0.10                  | 0.00                 | 0.29              | 0.00                | 0.00                  |
|            |            | Left retroauricular crease  | 75       | 0.54                  | 0.00                 | 0.41              | 0.00                | 0.21                  |
|            |            | Right retroauricular crease | 83       | 0.61                  | 0.00                 | 0.47              | 0.10                | 0.46                  |
|            |            | Skin average                | 62.5     | 0.36                  | 0.02                 | 0.34              | 0.02                | 0.17                  |
|            | Vagina     | Mid-vagina                  | 37       | 0.37                  | 0.62                 | 0.58              | 0.18                | 0.01                  |
|            |            | Posterior fornix            | 38       | 0.44                  | 0.50                 | 0.69              | 0.18                | 0.00                  |
|            |            | Vaginal introitus           | 37       | 0.31                  | 0.58                 | 0.49              | 0.11                | 0.06                  |
|            |            | Vagina average              | 37.3     | 0.37                  | 0.57                 | 0.59              | 0.15                | 0.02                  |

**Web Table 2.** Intra-class correlation coefficients for four alpha-diversity measures

|            |                | <b>Body site</b>            | <i>N</i>       | <b>PD_tree</b> † | <b>Chao1</b> | <i>S</i> <sub>obs</sub> † | <b>Shannon Index</b> |
|------------|----------------|-----------------------------|----------------|------------------|--------------|---------------------------|----------------------|
| CRC study  | Gut            | Stool                       | 34             | 0.34             | 0.37         | 0.33                      | 0.48                 |
| Costa Rica | Gut            | Stool                       | 121            | 0.58             | 0.44         | 0.43                      | 0.47                 |
|            | Oral           | Saliva                      | 42             | 0.60             | 0.55         | 0.51                      | 0.33                 |
| HMP        | Gut            | Stool                       | 100            | 0.66             | 0.58         | 0.60                      | 0.62                 |
|            | Oral           | Saliva                      | 94             | 0.39             | 0.41         | 0.43                      | 0.42                 |
|            | Oropharynx     | Buccal mucosa               | 101            | 0.26             | 0.29         | 0.24                      | 0.06                 |
|            |                | Hard palate                 | 95             | 0.25             | 0.14         | 0.20                      | 0.25                 |
|            |                | Keratinized gingiva         | 102            | 0.28             | 0.19         | 0.22                      | 0.27                 |
|            |                | Palatine tonsils            | 100            | 0.39             | 0.20         | 0.27                      | 0.26                 |
|            |                | Subgingival plaque          | 100            | 0.39             | 0.33         | 0.32                      | 0.37                 |
|            |                | Supragingival plaque        | 104            | 0.40             | 0.38         | 0.46                      | 0.48                 |
|            |                | Throat                      | 98             | 0.20             | 0.17         | 0.17                      | 0.24                 |
|            |                | Tongue dorsum               | 105            | 0.40             | 0.20         | 0.22                      | 0.30                 |
|            |                | Oral average                | 99             | 0.32             | 0.24         | 0.26                      | 0.28                 |
|            |                | Airway                      | Anterior nares | 64               | 0.55         | 0.48                      | 0.42                 |
|            | Skin           | Left antecubital fossa      | 14             | 0.49             | 0.30         | 0.40                      | 0.44                 |
|            |                | Right antecubital fossa     | 15             | 0.46             | 0.35         | 0.43                      | 0.45                 |
|            |                | Left retroauricular crease  | 63             | 0.61             | 0.65         | 0.63                      | 0.61                 |
|            |                | Right retroauricular crease | 71             | 0.39             | 0.45         | 0.47                      | 0.51                 |
|            |                | Skin average                | 41             | 0.49             | 0.44         | 0.48                      | 0.50                 |
|            | Vagina         | Mid-vagina                  | 37             | 0.56             | 0.28         | 0.37                      | 0.49                 |
|            |                | Posterior fornix            | 38             | 0.54             | 0.34         | 0.31                      | 0.54                 |
|            |                | Vaginal introitus           | 37             | 0.54             | 0.27         | 0.47                      | 0.49                 |
|            | Vagina average | 37                          | 0.55           | 0.29             | 0.38         | 0.51                      |                      |

† PD\_tree - phylogenetic distance whole tree; *S*<sub>obs</sub> - the number of observed species or operational taxonomic units (OTU).

**Web Table 3.** Intraclass correlation coefficients for unweighted Unifrac distance\*

|            |            | <b>Body Site</b>            | <b>N</b> | <b>PCoA1-5<br/>Average</b> | <b>PCoA<br/>1</b> | <b>PCoA2</b> | <b>PCoA3</b> | <b>PCoA4</b> | <b>PCoA5</b> |
|------------|------------|-----------------------------|----------|----------------------------|-------------------|--------------|--------------|--------------|--------------|
| CRC study  | Gut        | Stool                       | 34       | 0.61                       | 0.84              | 0.45         | 0.70         | 0.74         | 0.31         |
| Costa Rica | Gut        | Stool                       | 121      | 0.68                       | 0.81              | 0.72         | 0.58         | 0.63         | 0.65         |
|            | Oral       | Saliva                      | 42       | 0.73                       | 0.76              | 0.67         | 0.79         | 0.72         | 0.72         |
| HMP        | Gut        | Stool                       | 100      | 0.50                       | 0.76              | 0.47         | 0.35         | 0.45         | 0.47         |
|            | Oral       | Saliva                      | 86       | 0.26                       | 0.54              | 0.34         | 0.11         | 0.10         | 0.21         |
|            | Oropharynx | Buccal mucosa               | 101      | 0.11                       | 0.09              | 0.17         | 0.02         | 0.21         | 0.08         |
|            |            | Hard palate                 | 95       | 0.31                       | 0.44              | 0.56         | 0.15         | 0.21         | 0.18         |
|            |            | Keratinized gingiva         | 102      | 0.30                       | 0.61              | 0.45         | 0.05         | 0.25         | 0.14         |
|            |            | Palatine tonsils            | 100      | 0.24                       | 0.35              | 0.46         | 0.26         | 0.05         | 0.07         |
|            |            | Subgingival plaque          | 100      | 0.31                       | 0.47              | 0.28         | 0.33         | 0.33         | 0.14         |
|            |            | Supragingival plaque        | 104      | 0.26                       | 0.45              | 0.12         | 0.30         | 0.42         | 0.00         |
|            |            | Throat                      | 98       | 0.23                       | 0.38              | 0.29         | 0.19         | 0.00         | 0.29         |
|            |            | Tongue dorsum               | 105      | 0.26                       | 0.58              | 0.39         | 0.07         | 0.06         | 0.19         |
|            |            | Oral average                | 93       | 0.25                       | 0.42              | 0.34         | 0.17         | 0.19         | 0.14         |
|            | Airway     | Anterior nares              | 64       | 0.39                       | 0.28              | 0.67         | 0.09         | 0.39         | 0.52         |
|            | Skin       | Left antecubital fossa      | 14       | 0.19                       | 0.43              | 0.00         | 0.00         | 0.16         | 0.34         |
|            |            | Right antecubital fossa     | 15       | 0.09                       | 0.18              | 0.24         | 0.03         | 0.00         | 0.00         |
|            |            | Left retroauricular crease  | 63       | 0.15                       | 0.22              | 0.25         | 0.18         | 0.08         | 0.03         |
|            |            | Right retroauricular crease | 71       | 0.21                       | 0.16              | 0.32         | 0.20         | 0.21         | 0.14         |
|            |            | Skin average                | 41       | 0.16                       | 0.25              | 0.20         | 0.10         | 0.11         | 0.13         |
|            | Vagina     | Mid-vagina                  | 37       | 0.46                       | 0.60              | 0.54         | 0.42         | 0.28         | 0.49         |
|            |            | Posterior fornix            | 38       | 0.45                       | 0.70              | 0.69         | 0.78         | 0.07         | 0.00         |
|            |            | Vaginal introitus           | 37       | 0.39                       | 0.73              | 0.33         | 0.42         | 0.21         | 0.25         |
|            |            | Vagina average              | 37       | 0.43                       | 0.68              | 0.52         | 0.54         | 0.18         | 0.25         |

\* First five principal coordinates (PCoA1-5) of the distance matrices.

**Web Table 4.** Intraclass correlation coefficients for weighted Unifrac distance\*

|            |            | <b>Body Site</b>            | <b>N<sup>a</sup></b> | <b>PCoA1-5 Average</b> | <b>PCoA1</b> | <b>PCoA2</b> | <b>PCoA3</b> | <b>PCoA4</b> | <b>PCoA5</b> |
|------------|------------|-----------------------------|----------------------|------------------------|--------------|--------------|--------------|--------------|--------------|
| CRC study  | Gut        | Stool                       | 34                   | 0.52                   | 0.65         | 0.28         | 0.44         | 0.51         | 0.74         |
| Costa Rica | Gut        | Stool                       | 121                  | 0.52                   | 0.45         | 0.55         | 0.59         | 0.48         | 0.51         |
|            | Oral       | Saliva                      | 42                   | 0.40                   | 0.57         | 0.50         | 0.40         | 0            | 0.52         |
| HMP        | Gut        | Stool                       | 100                  | 0.41                   | 0.44         | 0.54         | 0.16         | 0.38         | 0.50         |
|            | Oral       | Saliva                      | 86                   | 0.42                   | 0.68         | 0.32         | 0.41         | 0.29         | 0.38         |
|            | Oropharynx | Buccal mucosa               | 101                  | 0.20                   | 0.22         | 0.16         | 0.36         | 0.12         | 0.16         |
|            |            | Hard palate                 | 95                   | 0.33                   | 0.39         | 0.41         | 0.35         | 0.20         | 0.32         |
|            |            | Keratinized gingiva         | 102                  | 0.31                   | 0.60         | 0.20         | 0.04         | 0.35         | 0.34         |
|            |            | Palatine tonsils            | 100                  | 0.27                   | 0.31         | 0.46         | 0.26         | 0.00         | 0.30         |
|            |            | Subgingival plaque          | 100                  | 0.26                   | 0.42         | 0.49         | 0.14         | 0.20         | 0.07         |
|            |            | Supragingival plaque        | 104                  | 0.31                   | 0.39         | 0.38         | 0.45         | 0.13         | 0.21         |
|            |            | Throat                      | 98                   | 0.29                   | 0.31         | 0.44         | 0.23         | 0.22         | 0.23         |
|            |            | Tongue dorsum               | 105                  | 0.33                   | 0.59         | 0.45         | 0.20         | 0.38         | 0.01         |
|            |            | Oral average                | 93.2                 | 0.29                   | 0.40         | 0.37         | 0.26         | 0.20         | 0.21         |
|            | Airway     | Anterior nares              | 64                   | 0.21                   | 0.34         | 0.00         | 0.10         | 0.15         | 0.43         |
|            | Skin       | Left antecubital fossa      | 14                   | 0.12                   | 0.08         | 0.20         | 0.12         | 0.00         | 0.22         |
|            |            | Right antecubital fossa     | 15                   | 0.16                   | 0.34         | 0.11         | 0.09         | 0.27         | 0.00         |
|            |            | Left retroauricular crease  | 63                   | 0.45                   | 0.69         | 0.27         | 0.49         | 0.38         | 0.40         |
|            |            | Right retroauricular crease | 71                   | 0.38                   | 0.68         | 0.00         | 0.41         | 0.24         | 0.57         |
|            |            | Skin average                | 40.8                 | 0.28                   | 0.45         | 0.14         | 0.28         | 0.22         | 0.30         |
|            | Vagina     | Mid-vagina                  | 37                   | 0.48                   | 0.55         | 0.68         | 0.32         | 0.22         | 0.61         |
|            |            | Posterior fornix            | 38                   | 0.26                   | 0.55         | 0.58         | 0.13         | 0.00         | 0.06         |
|            |            | Vaginal introitus           | 37                   | 0.42                   | 0.48         | 0.53         | 0.62         | 0.06         | 0.40         |
|            |            | Vagina average              | 37.3                 | 0.39                   | 0.53         | 0.60         | 0.36         | 0.09         | 0.36         |

\* First five principal coordinates (PCoA1-5) of the distance matrices.

**Web Table 5.** Proportion of explained variance for unweighted Unifrac distance\*

|            |                              | <b>PCoA1</b> | <b>PCoA2</b> | <b>PCoA3</b> | <b>PCoA4</b> | <b>PCoA5</b> | <b>PCoA1-5</b> |
|------------|------------------------------|--------------|--------------|--------------|--------------|--------------|----------------|
| CRC study  | Stool                        | 3.6%         | 2.5%         | 2.2%         | 2.1%         | 1.8%         | 12.2%          |
| Costa Rica | Saliva                       | 19.8%        | 5.8%         | 4.1%         | 3.2%         | 3.2%         | 36.0%          |
| Costa Rica | Stool                        | 11.0%        | 6.2%         | 4.0%         | 2.1%         | 2.0%         | 25.3%          |
| HMP        | Anterior_nares               | 14.4%        | 8.7%         | 5.9%         | 4.8%         | 4.6%         | 38.5%          |
| HMP        | Attached_Keratinized_gingiva | 19.8%        | 10.1%        | 7.7%         | 5.8%         | 4.9%         | 48.3%          |
| HMP        | Buccal_mucosa                | 11.5%        | 7.1%         | 6.5%         | 4.4%         | 3.9%         | 33.4%          |
| HMP        | Hard_palate                  | 9.3%         | 6.9%         | 5.6%         | 4.1%         | 3.6%         | 29.6%          |
| HMP        | Left_Antecubital_fossa       | 9.8%         | 5.5%         | 5.0%         | 3.9%         | 3.5%         | 27.7%          |
| HMP        | Left_Retroauricular_crease   | 18.7%        | 8.9%         | 7.0%         | 6.0%         | 4.9%         | 45.4%          |
| HMP        | Mid_vagina                   | 27.0%        | 9.4%         | 7.5%         | 6.0%         | 5.6%         | 55.6%          |
| HMP        | Palatine_Tonsils             | 10.8%        | 8.6%         | 5.2%         | 4.6%         | 3.9%         | 33.1%          |
| HMP        | Posterior_fonix              | 29.6%        | 10.3%        | 8.4%         | 6.6%         | 5.0%         | 59.8%          |
| HMP        | Right_Antecubital_fossa      | 8.7%         | 5.4%         | 4.4%         | 3.9%         | 3.8%         | 26.2%          |
| HMP        | Right_Retroauricular_crease  | 19.1%        | 9.6%         | 7.0%         | 5.1%         | 4.7%         | 45.5%          |
| HMP        | Saliva                       | 7.2%         | 6.8%         | 4.7%         | 3.9%         | 3.7%         | 26.5%          |
| HMP        | Stool                        | 9.0%         | 4.3%         | 3.8%         | 3.5%         | 2.9%         | 23.5%          |
| HMP        | Subgingival_plaque           | 14.4%        | 5.3%         | 5.1%         | 4.2%         | 3.7%         | 32.8%          |
| HMP        | Supragingival_plaque         | 14.7%        | 5.1%         | 4.9%         | 4.5%         | 3.5%         | 32.7%          |
| HMP        | Throat                       | 10.2%        | 6.9%         | 5.4%         | 4.1%         | 3.8%         | 30.5%          |
| HMP        | Tongue_dorsum                | 14.9%        | 8.4%         | 5.3%         | 4.6%         | 3.8%         | 37.0%          |
| HMP        | Vaginal_introitus            | 22.5%        | 8.3%         | 6.9%         | 6.1%         | 5.3%         | 49.1%          |

\* First five principal coordinates (PCoA1-5) of the distance matrices.



**Web Table 6.** Proportion of explained variance for weighted Unifrac distance\*

|            |                              | <b>PCoA1</b> | <b>PCoA2</b> | <b>PCoA3</b> | <b>PCoA4</b> | <b>PCoA5</b> | <b>PCoA1-5</b> |
|------------|------------------------------|--------------|--------------|--------------|--------------|--------------|----------------|
| CRC study  | Stool                        | 15.3%        | 5.2%         | 5.8%         | 3.9%         | 3.5%         | 33.7%          |
| Costa Rica | Saliva                       | 24.1%        | 15.5%        | 11.0%        | 5.3%         | 4.6%         | 60.4%          |
| Costa Rica | Stool                        | 31.4%        | 8.7%         | 5.0%         | 4.3%         | 3.6%         | 53.1%          |
| HMP        | Anterior_nares               | 25.0%        | 13.6%        | 10.7%        | 7.6%         | 5.8%         | 62.7%          |
| HMP        | Attached_Keratinized_gingiva | 39.6%        | 17.0%        | 6.8%         | 5.6%         | 2.8%         | 71.8%          |
| HMP        | Buccal_mucosa                | 31.4%        | 16.8%        | 7.2%         | 4.9%         | 3.3%         | 63.6%          |
| HMP        | Hard_palate                  | 32.8%        | 16.8%        | 6.0%         | 4.4%         | 3.8%         | 63.7%          |
| HMP        | Left_Antecubital_fossa       | 32.4%        | 14.4%        | 7.4%         | 6.0%         | 4.3%         | 64.5%          |
| HMP        | Left_Retroauricular_crease   | 51.3%        | 11.0%        | 5.8%         | 5.1%         | 3.3%         | 76.4%          |
| HMP        | Mid_vagina                   | 56.4%        | 13.8%        | 5.8%         | 4.4%         | 3.4%         | 83.8%          |
| HMP        | Palatine_Tonsils             | 30.0%        | 15.5%        | 8.5%         | 6.6%         | 3.2%         | 63.8%          |
| HMP        | Posterior_fonix              | 62.2%        | 15.4%        | 3.6%         | 3.5%         | 3.2%         | 88.0%          |
| HMP        | Right_Antecubital_fossa      | 34.5%        | 12.7%        | 7.0%         | 6.5%         | 4.5%         | 65.3%          |
| HMP        | Right_Retroauricular_crease  | 50.3%        | 10.4%        | 7.4%         | 5.9%         | 3.1%         | 77.0%          |
| HMP        | Saliva                       | 25.6%        | 16.2%        | 6.8%         | 5.1%         | 4.4%         | 58.2%          |
| HMP        | Stool                        | 46.9%        | 6.6%         | 5.9%         | 3.7%         | 3.0%         | 66.1%          |
| HMP        | Subgingival_plaque           | 31.1%        | 9.7%         | 7.9%         | 5.8%         | 4.5%         | 59.0%          |
| HMP        | Supragingival_plaque         | 26.8%        | 15.1%        | 8.8%         | 4.7%         | 4.4%         | 59.7%          |
| HMP        | Throat                       | 28.0%        | 16.7%        | 7.8%         | 5.7%         | 4.0%         | 62.2%          |
| HMP        | Tongue_dorsum                | 28.6%        | 19.0%        | 6.7%         | 5.8%         | 4.5%         | 64.6%          |
| HMP        | Vaginal_introitus            | 54.7%        | 13.0%        | 6.1%         | 4.1%         | 3.5%         | 81.4%          |

\* First five principal coordinates (PCoA1-5) of the distance matrices.

**Web Table 7.** Number of cases (assuming equal number of controls) required to detect an association with specified odds ratio (OR), at significance level=0.05, 80% power, based on 1, 2, or 3 fecal Specimens per Subject and the intraclass correlation coefficient (ICC) estimated from the fecal samples from the three populations.

|                                         |                          | Estimated ICC <sup>a</sup> | #Specimens per Subject | OR <sup>b</sup> |      |     |     |     |
|-----------------------------------------|--------------------------|----------------------------|------------------------|-----------------|------|-----|-----|-----|
|                                         |                          |                            |                        | 1.5             | 2    | 2.5 | 3   | 3.5 |
|                                         |                          |                            | 1                      | 1496            | 498  | 273 | 190 | 151 |
| Relative abundance of phylum-level taxa | Actinobacteria           | 0.44                       | 2                      | 1077            | 359  | 196 | 136 | 109 |
|                                         |                          |                            | 3                      | 938             | 312  | 171 | 119 | 94  |
|                                         |                          |                            | 1                      | 1780            | 593  | 325 | 226 | 180 |
|                                         | Bacteroidetes            | 0.37                       | 2                      | 1219            | 406  | 222 | 154 | 123 |
|                                         |                          |                            | 3                      | 1032            | 344  | 188 | 131 | 104 |
|                                         |                          |                            | 1                      | 1568            | 522  | 286 | 199 | 158 |
|                                         | Firmicutes               | 0.42                       | 2                      | 1113            | 371  | 203 | 141 | 112 |
|                                         |                          |                            | 3                      | 961             | 320  | 175 | 122 | 97  |
|                                         |                          |                            | 1                      | 3659            | 1219 | 668 | 464 | 370 |
|                                         | Fusobacteria             | 0.18                       | 2                      | 2158            | 719  | 394 | 274 | 218 |
|                                         |                          |                            | 3                      | 1658            | 552  | 302 | 210 | 167 |
|                                         |                          |                            | 1                      | 2271            | 757  | 414 | 288 | 229 |
| Alpha diversity                         | Proteobacteria           | 0.29                       | 2                      | 1464            | 488  | 267 | 186 | 148 |
|                                         |                          |                            | 3                      | 1196            | 398  | 218 | 151 | 121 |
|                                         |                          |                            | 1                      | 1135            | 378  | 207 | 144 | 114 |
|                                         | PD_tree                  | 0.58                       | 2                      | 897             | 299  | 163 | 113 | 90  |
|                                         |                          |                            | 3                      | 817             | 272  | 149 | 103 | 82  |
|                                         |                          |                            | 1                      | 1496            | 498  | 273 | 190 | 151 |
|                                         | Chao1                    | 0.44                       | 2                      | 1077            | 359  | 196 | 136 | 109 |
|                                         |                          |                            | 3                      | 938             | 312  | 171 | 119 | 94  |
|                                         |                          |                            | 1                      | 1531            | 510  | 279 | 194 | 155 |
|                                         | # species                | 0.43                       | 2                      | 1095            | 365  | 199 | 139 | 110 |
|                                         |                          |                            | 3                      | 949             | 316  | 173 | 120 | 96  |
|                                         |                          |                            | 1                      | 1401            | 467  | 255 | 177 | 141 |
| Beta diversity                          | Shannon index            | 0.47                       | 2                      | 1030            | 343  | 188 | 130 | 104 |
|                                         |                          |                            | 3                      | 906             | 302  | 165 | 115 | 91  |
|                                         |                          |                            | 1                      | 813             | 271  | 148 | 103 | 82  |
|                                         | Unweighted UniFrac PCoA1 | 0.81                       | 2                      | 735             | 245  | 134 | 93  | 74  |
|                                         |                          |                            | 3                      | 710             | 236  | 129 | 90  | 71  |
|                                         |                          |                            | 1                      | 1372            | 457  | 250 | 174 | 138 |
|                                         | Weighted UniFrac PCoA1   | 0.48                       | 2                      | 1015            | 338  | 185 | 128 | 102 |
|                                         |                          |                            | 3                      | 896             | 298  | 163 | 113 | 90  |

**Web Table 8.** Number of cases (assuming equal number of controls) required to detect an association with specified odds ratio (OR), at significance level=0.001, 80% power, based on 1, 2, or 3 fecal Specimens per Subject and the intraclass correlation coefficient (ICC) estimated from the fecal samples from the three populations.

|                                         |                          | Estimated ICC <sup>a</sup> | #Specimens per Subject | OR <sup>b</sup> |      |      |      |     |
|-----------------------------------------|--------------------------|----------------------------|------------------------|-----------------|------|------|------|-----|
|                                         |                          |                            |                        | 1.5             | 2    | 2.5  | 3    | 3.5 |
|                                         |                          |                            | 1                      | 3256            | 1085 | 594  | 413  | 329 |
| Relative abundance of phylum-level taxa | Actinobacteria           | 0.44                       | 2                      | 2344            | 781  | 428  | 297  | 237 |
|                                         |                          |                            | 3                      | 2040            | 680  | 372  | 259  | 206 |
|                                         |                          |                            | 1                      | 3872            | 1290 | 707  | 491  | 392 |
|                                         | Bacteroidetes            | 0.37                       | 2                      | 2652            | 884  | 484  | 336  | 268 |
|                                         |                          |                            | 3                      | 2246            | 748  | 410  | 285  | 227 |
|                                         |                          |                            | 1                      | 3411            | 1137 | 622  | 433  | 345 |
|                                         | Firmicutes               | 0.42                       | 2                      | 2422            | 807  | 442  | 307  | 245 |
|                                         |                          |                            | 3                      | 2092            | 697  | 382  | 265  | 211 |
|                                         |                          |                            | 1                      | 7960            | 2653 | 1453 | 1010 | 805 |
|                                         | Fusobacteria             | 0.18                       | 2                      | 4696            | 1565 | 857  | 596  | 475 |
|                                         |                          |                            | 3                      | 3608            | 1202 | 658  | 458  | 365 |
|                                         |                          |                            | 1                      | 4940            | 1646 | 902  | 627  | 500 |
|                                         | Proteobacteria           | 0.29                       | 2                      | 3186            | 1062 | 581  | 404  | 322 |
|                                         |                          |                            | 3                      | 2602            | 867  | 475  | 330  | 263 |
| Alpha diversity                         |                          |                            | 1                      | 2470            | 823  | 451  | 313  | 250 |
|                                         | PD_tree                  | 0.58                       | 2                      | 1951            | 650  | 356  | 247  | 197 |
|                                         |                          |                            | 3                      | 1778            | 592  | 324  | 225  | 180 |
|                                         |                          |                            | 1                      | 3256            | 1085 | 594  | 413  | 329 |
|                                         | Chao1                    | 0.44                       | 2                      | 2344            | 781  | 428  | 297  | 237 |
|                                         |                          |                            | 3                      | 2040            | 680  | 372  | 259  | 206 |
|                                         |                          |                            | 1                      | 3332            | 1110 | 608  | 423  | 337 |
|                                         | # species                | 0.43                       | 2                      | 2382            | 794  | 435  | 302  | 241 |
|                                         |                          |                            | 3                      | 2065            | 688  | 377  | 262  | 209 |
|                                         |                          |                            | 1                      | 3048            | 1016 | 556  | 387  | 308 |
|                                         | Shannon index            | 0.47                       | 2                      | 2240            | 746  | 409  | 284  | 226 |
|                                         |                          | 3                          | 1971                   | 657             | 360  | 250  | 199  |     |
| Beta diversity                          |                          |                            | 1                      | 1768            | 589  | 323  | 224  | 179 |
|                                         | Unweighted UniFrac PCoA1 | 0.81                       | 2                      | 1600            | 533  | 292  | 203  | 162 |
|                                         |                          |                            | 3                      | 1544            | 514  | 282  | 196  | 156 |
|                                         |                          |                            | 1                      | 2985            | 995  | 545  | 379  | 302 |
|                                         | Weighted UniFrac PCoA1   | 0.48                       | 2                      | 2208            | 736  | 403  | 280  | 223 |
|                                         |                          |                            | 3                      | 1950            | 650  | 356  | 247  | 197 |

**Web Table 9.** Number of cases (assuming equal number of controls) required to detect an association with specified odds ratio (OR), at significance level=0.0001, 80% power, based on 1, 2, or 3 fecal Specimens per Subject and the intraclass correlation coefficient (ICC) estimated from the fecal samples from the three populations.

|                                         |                          | Estimated ICC <sup>a</sup> | #Specimens per Subject | OR <sup>b</sup> |      |      |      |      |
|-----------------------------------------|--------------------------|----------------------------|------------------------|-----------------|------|------|------|------|
|                                         |                          |                            |                        | 1.5             | 2    | 2.5  | 3    | 3.5  |
|                                         |                          |                            | 1                      | 4270            | 1423 | 779  | 542  | 432  |
| Relative abundance of phylum-level taxa | Actinobacteria           | 0.44                       | 2                      | 3075            | 1024 | 561  | 390  | 311  |
|                                         |                          |                            | 3                      | 2676            | 892  | 488  | 339  | 270  |
|                                         |                          |                            | 1                      | 5078            | 1692 | 927  | 644  | 514  |
|                                         | Bacteroidetes            | 0.37                       | 2                      | 3479            | 1159 | 635  | 441  | 352  |
|                                         |                          |                            | 3                      | 2945            | 981  | 537  | 374  | 298  |
|                                         |                          |                            | 1                      | 4474            | 1491 | 817  | 568  | 452  |
|                                         | Firmicutes               | 0.42                       | 2                      | 3176            | 1058 | 580  | 403  | 321  |
|                                         |                          |                            | 3                      | 2744            | 914  | 501  | 348  | 277  |
|                                         |                          |                            | 1                      | 10439           | 3479 | 1906 | 1325 | 1056 |
|                                         | Fusobacteria             | 0.18                       | 2                      | 6159            | 2053 | 1124 | 782  | 623  |
|                                         |                          |                            | 3                      | 4732            | 1577 | 864  | 600  | 479  |
|                                         |                          |                            | 1                      | 6479            | 2159 | 1183 | 822  | 655  |
|                                         | Proteobacteria           | 0.29                       | 2                      | 4179            | 1393 | 763  | 530  | 423  |
|                                         |                          |                            | 3                      | 3412            | 1137 | 623  | 433  | 345  |
| Alpha diversity                         |                          |                            | 1                      | 3239            | 1079 | 591  | 411  | 327  |
|                                         | PD_tree                  | 0.58                       | 2                      | 2559            | 853  | 467  | 324  | 259  |
|                                         |                          |                            | 3                      | 2332            | 777  | 425  | 296  | 236  |
|                                         |                          |                            | 1                      | 4270            | 1423 | 779  | 542  | 432  |
|                                         | Chao1                    | 0.44                       | 2                      | 3075            | 1024 | 561  | 390  | 311  |
|                                         |                          |                            | 3                      | 2676            | 892  | 488  | 339  | 270  |
|                                         |                          |                            | 1                      | 4370            | 1456 | 798  | 554  | 442  |
|                                         | # species                | 0.43                       | 2                      | 3124            | 1041 | 570  | 396  | 316  |
|                                         |                          |                            | 3                      | 2709            | 903  | 494  | 344  | 274  |
|                                         |                          |                            | 1                      | 3998            | 1332 | 730  | 507  | 404  |
|                                         | Shannon index            | 0.47                       | 2                      | 2938            | 979  | 536  | 373  | 297  |
|                                         |                          | 3                          | 2585                   | 861             | 472  | 328  | 261  |      |
| Beta diversity                          |                          |                            | 1                      | 2319            | 773  | 423  | 294  | 234  |
|                                         | Unweighted UniFrac PCoA1 | 0.81                       | 2                      | 2099            | 699  | 383  | 266  | 212  |
|                                         |                          |                            | 3                      | 2026            | 675  | 369  | 257  | 205  |
|                                         |                          |                            | 1                      | 3914            | 1304 | 714  | 497  | 396  |
|                                         | Weighted UniFrac PCoA1   | 0.48                       | 2                      | 2897            | 965  | 529  | 367  | 293  |
|                                         |                          |                            | 3                      | 2557            | 852  | 467  | 324  | 258  |

**Web Table 10.** Number of cases (assuming equal number of controls) required to detect an association with specified odds ratio (OR), at significance level=0.00001, 80% power, based on 1, 2, or 3 fecal Specimens per Subject and the intraclass correlation coefficient (ICC) estimated from the fecal samples from the three populations.

|                                         |                          | Estimated ICC <sup>a</sup> | #Specimens per Subject | OR <sup>b</sup> |      |      |      |      |
|-----------------------------------------|--------------------------|----------------------------|------------------------|-----------------|------|------|------|------|
|                                         |                          |                            |                        | 1.5             | 2    | 2.5  | 3    | 3.5  |
|                                         |                          |                            | 1                      | 5274            | 1758 | 963  | 669  | 533  |
| Relative abundance of phylum-level taxa | Actinobacteria           | 0.44                       | 2                      | 3797            | 1265 | 693  | 482  | 384  |
|                                         |                          |                            | 3                      | 3305            | 1101 | 603  | 419  | 334  |
|                                         |                          |                            | 1                      | 6272            | 2090 | 1145 | 796  | 634  |
|                                         | Bacteroidetes            | 0.37                       | 2                      | 4296            | 1432 | 784  | 545  | 434  |
|                                         |                          |                            | 3                      | 3637            | 1212 | 664  | 461  | 368  |
|                                         |                          |                            | 1                      | 5525            | 1841 | 1009 | 701  | 559  |
|                                         | Firmicutes               | 0.42                       | 2                      | 3923            | 1307 | 716  | 498  | 397  |
|                                         |                          |                            | 3                      | 3388            | 1129 | 618  | 430  | 343  |
|                                         |                          |                            | 1                      | 12892           | 4297 | 2354 | 1636 | 1305 |
|                                         | Fusobacteria             | 0.18                       | 2                      | 7606            | 2535 | 1389 | 965  | 770  |
|                                         |                          |                            | 3                      | 5844            | 1948 | 1067 | 742  | 591  |
|                                         |                          |                            | 1                      | 8002            | 2667 | 1461 | 1016 | 810  |
|                                         | Proteobacteria           | 0.29                       | 2                      | 5161            | 1720 | 942  | 655  | 522  |
|                                         |                          |                            | 3                      | 4214            | 1404 | 769  | 535  | 426  |
| Alpha diversity                         |                          |                            | 1                      | 4001            | 1333 | 730  | 508  | 405  |
|                                         | PD_tree                  | 0.58                       | 2                      | 3160            | 1053 | 577  | 401  | 319  |
|                                         |                          |                            | 3                      | 2880            | 960  | 526  | 365  | 291  |
|                                         |                          |                            | 1                      | 5274            | 1758 | 963  | 669  | 533  |
|                                         | Chao1                    | 0.44                       | 2                      | 3797            | 1265 | 693  | 482  | 384  |
|                                         |                          |                            | 3                      | 3305            | 1101 | 603  | 419  | 334  |
|                                         |                          |                            | 1                      | 5396            | 1798 | 985  | 685  | 546  |
|                                         | # species                | 0.43                       | 2                      | 3858            | 1286 | 704  | 489  | 390  |
|                                         |                          |                            | 3                      | 3346            | 1115 | 611  | 424  | 338  |
|                                         |                          |                            | 1                      | 4937            | 1645 | 901  | 626  | 499  |
|                                         | Shannon index            | 0.47                       | 2                      | 3629            | 1209 | 662  | 460  | 367  |
|                                         |                          | 3                          | 3192                   | 1064            | 583  | 405  | 323  |      |
| Beta diversity                          |                          |                            | 1                      | 2865            | 954  | 523  | 363  | 290  |
|                                         | Unweighted UniFrac PCoA1 | 0.81                       | 2                      | 2592            | 864  | 473  | 329  | 262  |
|                                         |                          |                            | 3                      | 2502            | 834  | 456  | 317  | 253  |
|                                         |                          |                            | 1                      | 4834            | 1611 | 882  | 613  | 489  |
|                                         | Weighted UniFrac PCoA1   | 0.48                       | 2                      | 3577            | 1192 | 653  | 454  | 362  |
|                                         |                          |                            | 3                      | 3158            | 1052 | 576  | 401  | 319  |

**Web Table 11.** Number of cases (assuming cases:controls=1:3) required to detect an association with specified odds ratio (OR), at significance level=0.05, 80% power, based on 1, 2, or 3 fecal Specimens per Subject and the intraclass correlation coefficient (ICC) estimated from the fecal samples from the three populations.

|                                         |                          | Estimated ICC <sup>a</sup> | #Specimens per Subject | OR <sup>b</sup> |     |     |     |     |
|-----------------------------------------|--------------------------|----------------------------|------------------------|-----------------|-----|-----|-----|-----|
|                                         |                          |                            |                        | 1.5             | 2   | 2.5 | 3   | 3.5 |
|                                         |                          |                            | 1                      | 997             | 332 | 182 | 126 | 101 |
| Relative abundance of phylum-level taxa | Actinobacteria           | 0.44                       | 2                      | 718             | 239 | 131 | 91  | 72  |
|                                         |                          |                            | 3                      | 625             | 208 | 114 | 79  | 63  |
|                                         |                          |                            | 1                      | 1186            | 395 | 216 | 150 | 120 |
|                                         | Bacteroidetes            | 0.37                       | 2                      | 812             | 270 | 148 | 103 | 82  |
|                                         |                          |                            | 3                      | 688             | 229 | 125 | 87  | 69  |
|                                         |                          |                            | 1                      | 1045            | 348 | 190 | 132 | 105 |
|                                         | Firmicutes               | 0.42                       | 2                      | 742             | 247 | 135 | 94  | 75  |
|                                         |                          |                            | 3                      | 641             | 213 | 117 | 81  | 64  |
|                                         |                          |                            | 1                      | 2439            | 813 | 445 | 309 | 246 |
|                                         | Fusobacteria             | 0.18                       | 2                      | 1439            | 479 | 262 | 182 | 145 |
|                                         |                          |                            | 3                      | 1105            | 368 | 201 | 140 | 111 |
|                                         |                          |                            | 1                      | 1514            | 504 | 276 | 192 | 153 |
| Alpha diversity                         | Proteobacteria           | 0.29                       | 2                      | 976             | 325 | 178 | 124 | 98  |
|                                         |                          |                            | 3                      | 797             | 265 | 145 | 101 | 80  |
|                                         |                          |                            | 1                      | 757             | 252 | 138 | 96  | 76  |
|                                         | PD_tree                  | 0.58                       | 2                      | 598             | 199 | 109 | 75  | 60  |
|                                         |                          |                            | 3                      | 545             | 181 | 99  | 69  | 55  |
|                                         |                          |                            | 1                      | 997             | 332 | 182 | 126 | 101 |
|                                         | Chao1                    | 0.44                       | 2                      | 718             | 239 | 131 | 91  | 72  |
|                                         |                          |                            | 3                      | 625             | 208 | 114 | 79  | 63  |
|                                         |                          |                            | 1                      | 1021            | 340 | 186 | 129 | 103 |
|                                         | # species                | 0.43                       | 2                      | 730             | 243 | 133 | 92  | 73  |
|                                         |                          |                            | 3                      | 633             | 211 | 115 | 80  | 64  |
|                                         |                          |                            | 1                      | 934             | 311 | 170 | 118 | 94  |
| Beta diversity                          | Shannon index            | 0.47                       | 2                      | 686             | 228 | 125 | 87  | 69  |
|                                         |                          |                            | 3                      | 604             | 201 | 110 | 76  | 61  |
|                                         |                          |                            | 1                      | 542             | 180 | 98  | 68  | 54  |
|                                         | Unweighted UniFrac PCoA1 | 0.81                       | 2                      | 490             | 163 | 89  | 62  | 49  |
|                                         |                          |                            | 3                      | 473             | 157 | 86  | 60  | 47  |
|                                         |                          |                            | 1                      | 914             | 304 | 167 | 116 | 92  |
|                                         | Weighted UniFrac PCoA1   | 0.48                       | 2                      | 676             | 225 | 123 | 85  | 68  |
|                                         |                          |                            | 3                      | 597             | 199 | 109 | 75  | 60  |

**Web Table 12.** Number of cases (assuming cases: controls =1:3) required to detect an association with specified odds ratio (OR), at significance level=0.001, 80% power, based on 1, 2, or 3 fecal Specimens per Subject and the intraclass correlation coefficient (ICC) estimated from the fecal samples from the three populations.

|                                         |                          | Estimated ICC <sup>a</sup> | #Specimens per Subject | OR <sup>b</sup> |      |     |     |     |
|-----------------------------------------|--------------------------|----------------------------|------------------------|-----------------|------|-----|-----|-----|
|                                         |                          |                            |                        | 1.5             | 2    | 2.5 | 3   | 3.5 |
|                                         |                          |                            | 1                      | 2170            | 723  | 396 | 275 | 219 |
| Relative abundance of phylum-level taxa | Actinobacteria           | 0.44                       | 2                      | 1563            | 521  | 285 | 198 | 158 |
|                                         |                          |                            | 3                      | 1360            | 453  | 248 | 172 | 137 |
|                                         |                          |                            | 1                      | 2581            | 860  | 471 | 327 | 261 |
|                                         | Bacteroidetes            | 0.37                       | 2                      | 1768            | 589  | 322 | 224 | 179 |
|                                         |                          |                            | 3                      | 1497            | 499  | 273 | 190 | 151 |
|                                         |                          |                            | 1                      | 2274            | 758  | 415 | 288 | 230 |
|                                         | Firmicutes               | 0.42                       | 2                      | 1614            | 538  | 294 | 205 | 163 |
|                                         |                          |                            | 3                      | 1394            | 464  | 254 | 177 | 141 |
|                                         |                          |                            | 1                      | 5306            | 1768 | 969 | 673 | 537 |
|                                         | Fusobacteria             | 0.18                       | 2                      | 3130            | 1043 | 571 | 397 | 316 |
|                                         |                          |                            | 3                      | 2405            | 801  | 439 | 305 | 243 |
|                                         |                          |                            | 1                      | 3293            | 1097 | 601 | 418 | 333 |
| Alpha diversity                         | Proteobacteria           | 0.29                       | 2                      | 2124            | 708  | 387 | 269 | 215 |
|                                         |                          |                            | 3                      | 1734            | 578  | 316 | 220 | 175 |
|                                         |                          |                            | 1                      | 1646            | 548  | 300 | 209 | 166 |
|                                         | PD_tree                  | 0.58                       | 2                      | 1301            | 433  | 237 | 165 | 131 |
|                                         |                          |                            | 3                      | 1185            | 395  | 216 | 150 | 120 |
|                                         |                          |                            | 1                      | 2170            | 723  | 396 | 275 | 219 |
|                                         | Chao1                    | 0.44                       | 2                      | 1563            | 521  | 285 | 198 | 158 |
|                                         |                          |                            | 3                      | 1360            | 453  | 248 | 172 | 137 |
|                                         |                          |                            | 1                      | 2221            | 740  | 405 | 282 | 224 |
|                                         | # species                | 0.43                       | 2                      | 1588            | 529  | 290 | 201 | 160 |
|                                         |                          |                            | 3                      | 1377            | 459  | 251 | 174 | 139 |
|                                         |                          |                            | 1                      | 2032            | 677  | 371 | 258 | 205 |
| Beta diversity                          | Shannon index            | 0.47                       | 2                      | 1493            | 497  | 272 | 189 | 151 |
|                                         |                          |                            | 3                      | 1314            | 438  | 240 | 166 | 133 |
|                                         |                          |                            | 1                      | 1179            | 393  | 215 | 149 | 119 |
|                                         | Unweighted UniFrac PCoA1 | 0.81                       | 2                      | 1067            | 355  | 194 | 135 | 108 |
|                                         |                          |                            | 3                      | 1029            | 343  | 188 | 130 | 104 |
|                                         |                          |                            | 1                      | 1990            | 663  | 363 | 252 | 201 |
|                                         | Weighted UniFrac PCoA1   | 0.48                       | 2                      | 1472            | 490  | 268 | 186 | 149 |
|                                         |                          | 3                          | 1300                   | 433             | 237  | 165 | 131 |     |

**Web Table 13.** Number of cases (assuming cases: controls =1:3) required to detect an association with specified odds ratio (OR), at significance level=0.0001, 80% power, based on 1, 2, or 3 fecal Specimens per Subject and the intraclass correlation coefficient (ICC) estimated from the fecal samples from the three populations.

|                                         |                          | Estimated ICC <sup>a</sup> | #Specimens per Subject | OR <sup>b</sup> |      |      |     |     |
|-----------------------------------------|--------------------------|----------------------------|------------------------|-----------------|------|------|-----|-----|
|                                         |                          |                            |                        | 1.5             | 2    | 2.5  | 3   | 3.5 |
|                                         |                          |                            | 1                      | 2847            | 949  | 519  | 361 | 288 |
| Relative abundance of phylum-level taxa | Actinobacteria           | 0.44                       | 2                      | 2050            | 683  | 374  | 260 | 207 |
|                                         |                          |                            | 3                      | 1784            | 594  | 325  | 226 | 180 |
|                                         |                          |                            | 1                      | 3385            | 1128 | 618  | 429 | 342 |
|                                         | Bacteroidetes            | 0.37                       | 2                      | 2319            | 773  | 423  | 294 | 234 |
|                                         |                          |                            | 3                      | 1963            | 654  | 358  | 249 | 198 |
|                                         |                          |                            | 1                      | 2982            | 994  | 544  | 378 | 301 |
|                                         | Firmicutes               | 0.42                       | 2                      | 2117            | 705  | 386  | 268 | 214 |
|                                         |                          |                            | 3                      | 1829            | 609  | 334  | 232 | 185 |
|                                         |                          |                            | 1                      | 6959            | 2319 | 1270 | 883 | 704 |
|                                         | Fusobacteria             | 0.18                       | 2                      | 4106            | 1368 | 749  | 521 | 415 |
|                                         |                          |                            | 3                      | 3155            | 1051 | 576  | 400 | 319 |
|                                         |                          |                            | 1                      | 4319            | 1439 | 788  | 548 | 437 |
| Alpha diversity                         | Proteobacteria           | 0.29                       | 2                      | 2786            | 928  | 508  | 353 | 282 |
|                                         |                          |                            | 3                      | 2275            | 758  | 415  | 288 | 230 |
|                                         |                          |                            | 1                      | 2159            | 719  | 394  | 274 | 218 |
|                                         | PD_tree                  | 0.58                       | 2                      | 1706            | 568  | 311  | 216 | 172 |
|                                         |                          |                            | 3                      | 1555            | 518  | 283  | 197 | 157 |
|                                         |                          |                            | 1                      | 2847            | 949  | 519  | 361 | 288 |
|                                         | Chao1                    | 0.44                       | 2                      | 2050            | 683  | 374  | 260 | 207 |
|                                         |                          |                            | 3                      | 1784            | 594  | 325  | 226 | 180 |
|                                         |                          |                            | 1                      | 2913            | 971  | 532  | 369 | 294 |
|                                         | # species                | 0.43                       | 2                      | 2083            | 694  | 380  | 264 | 210 |
|                                         |                          |                            | 3                      | 1806            | 602  | 329  | 229 | 182 |
|                                         |                          |                            | 1                      | 2665            | 888  | 486  | 338 | 269 |
| Beta diversity                          | Shannon index            | 0.47                       | 2                      | 1959            | 653  | 357  | 248 | 198 |
|                                         |                          |                            | 3                      | 1723            | 574  | 314  | 218 | 174 |
|                                         |                          |                            | 1                      | 1546            | 515  | 282  | 196 | 156 |
|                                         | Unweighted UniFrac PCoA1 | 0.81                       | 2                      | 1399            | 466  | 255  | 177 | 141 |
|                                         |                          |                            | 3                      | 1350            | 450  | 246  | 171 | 136 |
|                                         |                          |                            | 1                      | 2609            | 869  | 476  | 331 | 264 |
|                                         | Weighted UniFrac PCoA1   | 0.48                       | 2                      | 1931            | 643  | 352  | 245 | 195 |
|                                         |                          |                            | 3                      | 1705            | 568  | 311  | 216 | 172 |



**Web Table 14.** Number of cases (assuming cases: controls =1:3) required to detect an association with specified odds ratio (OR), at significance level=0.00001, 80% power, based on 1, 2, or 3 fecal Specimens per Subject and the intraclass correlation coefficient (ICC) estimated from the fecal samples from the three populations.

|                                         |                          | Estimated ICC <sup>a</sup> | #Specimens per Subject | OR <sup>b</sup> |      |      |      |     |
|-----------------------------------------|--------------------------|----------------------------|------------------------|-----------------|------|------|------|-----|
|                                         |                          |                            |                        | 1.5             | 2    | 2.5  | 3    | 3.5 |
|                                         |                          |                            | 1                      | 3516            | 1172 | 642  | 446  | 355 |
| Relative abundance of phylum-level taxa | Actinobacteria           | 0.44                       | 2                      | 2531            | 843  | 462  | 321  | 256 |
|                                         |                          |                            | 3                      | 2203            | 734  | 402  | 279  | 223 |
|                                         |                          |                            | 1                      | 4181            | 1393 | 763  | 530  | 423 |
|                                         | Bacteroidetes            | 0.37                       | 2                      | 2864            | 954  | 523  | 363  | 289 |
|                                         |                          |                            | 3                      | 2425            | 808  | 442  | 307  | 245 |
|                                         |                          |                            | 1                      | 3683            | 1227 | 672  | 467  | 372 |
|                                         | Firmicutes               | 0.42                       | 2                      | 2615            | 871  | 477  | 332  | 264 |
|                                         |                          |                            | 3                      | 2259            | 753  | 412  | 286  | 228 |
|                                         |                          |                            | 1                      | 8595            | 2864 | 1569 | 1091 | 870 |
|                                         | Fusobacteria             | 0.18                       | 2                      | 5071            | 1690 | 926  | 643  | 513 |
|                                         |                          |                            | 3                      | 3896            | 1298 | 711  | 494  | 394 |
|                                         |                          |                            | 1                      | 5334            | 1778 | 974  | 677  | 540 |
|                                         | Proteobacteria           | 0.29                       | 2                      | 3440            | 1146 | 628  | 436  | 348 |
|                                         |                          |                            | 3                      | 2809            | 936  | 513  | 356  | 284 |
| Alpha diversity                         |                          |                            | 1                      | 2667            | 889  | 487  | 338  | 270 |
|                                         | PD_tree                  | 0.58                       | 2                      | 2107            | 702  | 384  | 267  | 213 |
|                                         |                          |                            | 3                      | 1920            | 640  | 350  | 243  | 194 |
|                                         |                          |                            | 1                      | 3516            | 1172 | 642  | 446  | 355 |
|                                         | Chao1                    | 0.44                       | 2                      | 2531            | 843  | 462  | 321  | 256 |
|                                         |                          |                            | 3                      | 2203            | 734  | 402  | 279  | 223 |
|                                         |                          |                            | 1                      | 3597            | 1199 | 657  | 456  | 364 |
|                                         | # species                | 0.43                       | 2                      | 2572            | 857  | 469  | 326  | 260 |
|                                         |                          |                            | 3                      | 2230            | 743  | 407  | 283  | 225 |
|                                         |                          |                            | 1                      | 3291            | 1097 | 601  | 417  | 333 |
|                                         | Shannon index            | 0.47                       | 2                      | 2419            | 806  | 441  | 307  | 244 |
|                                         |                          | 3                          | 2128                   | 709             | 388  | 270  | 215  |     |
| Beta diversity                          |                          |                            | 1                      | 1910            | 636  | 348  | 242  | 193 |
|                                         | Unweighted UniFrac PCoA1 | 0.81                       | 2                      | 1728            | 576  | 315  | 219  | 174 |
|                                         |                          |                            | 3                      | 1668            | 556  | 304  | 211  | 168 |
|                                         |                          |                            | 1                      | 3223            | 1074 | 588  | 409  | 326 |
|                                         | Weighted UniFrac PCoA1   | 0.48                       | 2                      | 2385            | 795  | 435  | 302  | 241 |
|                                         |                          |                            | 3                      | 2105            | 701  | 384  | 267  | 213 |
